# Supplementary material
Source: PubMed Central journal article supplement (PMC514459)
Supplement: pnas_101_33_12212__2.pdf [file pnas_101_33_12212__2.pdf]

|              |            |            |            |            |            |            |
|--------------|------------|------------|------------|------------|------------|------------|
|              | 1          |            |            |            |            | 50         |
| p73RhoGAP    | .....      | .....      | .....      | .....      | RLAEMLVEQC | VDFIRQRLGK |
| Bcr          | ....LKRMP  | SRKQTGVFGV | KIAVVTKRER | SKVRYTVRQC | VEEIERRGME |            |
| n-Chimerin   | .....      | LKHVKKVYSC | DLTTLVKAHT | TKRMMVDMC  | IREIESRGLN |            |
| p50RhoGAP    | ....PPRPP  | LPNQQFGVSL | QHLQEKNEPQ | EPIPIVLRET | VAYLQAHALT |            |
| p85 $\alpha$ | PVAPGSSKTE | ADVEQQALTL | PDLAEQFAPP | DIAPLLIKL  | VEAIEKKGLE |            |
| p190RhoGAP   | .....      | .ATWESNYFG | VPLTTVTPE  | KPIEIFIERC | IEYIEATGLS |            |

|              |            |            |            |            |             |       |
|--------------|------------|------------|------------|------------|-------------|-------|
|              | 51         | *          |            |            |             | * 100 |
| p73RhoGAP    | EEGLFRLPGQ | ANLVKELQDA | FDCGEK..PS | FDSNTDVH.T | VASLLKLYLR  |       |
| Bcr          | EVGIYRVSGV | ATDIQALKAA | FDMNND.VS  | VMMSEMDVNA | IAGTLKLYFR  |       |
| n-Chimerin   | SEGLYRVSGF | SDLIEDVKMA | FDRDGEKADI | SVNMYEDINI | ITGALKLYFR  |       |
| p50RhoGAP    | TEGIFRRSAN | TQVVREVQQK | YNMGLP...V | DFDQYNELHL | PAVILKTFRLR |       |
| p85 $\alpha$ | CSTLYFTQSS | SN.LAELRQL | LDCDTP...S | VDLEMIDVHV | LADAKRYLL   |       |
| p190RhoGAP   | TEGIYRVSGN | KSEIESLQRQ | FDQDHNLD   | LAEKDFTVNT | VAGAMKSFSS  |       |

|              |            |             |            |            |            |     |
|--------------|------------|-------------|------------|------------|------------|-----|
|              | 101        |             |            |            |            | 150 |
| p73RhoGAP    | ELPDEVIPYA | KYEDFLSCAK  | LLSKEE..EA | GVKELAKQVK | SIEVNVNLL  |     |
| Bcr          | ELPDEVFTDE | FYPNFAEGIA  | LSDPVA.... | KESCMNLLL  | SIEEANLLTF |     |
| n-Chimerin   | DLPIPLITYD | AYPKFIESAK  | IMDPDE.... | QLETLHEALK | LIEPAHCETL |     |
| p50RhoGAP    | ELPDEVLTDF | LYPHVVGFLN  | IDESQR.... | .VPATLQVLQ | TIEEENYQVL |     |
| p85 $\alpha$ | DLNDEVIPAA | VYSEMI SLAP | EVQSSEEY.I | QLLKKLIRSP | SIEHQYWLTL |     |
| p190RhoGAP   | ELPDEVVPYN | MQIDLVEAHK  | INDREQ.... | KLHALKEVLK | KIEKENHEVF |     |

|              |             |            |            |            |            |     |
|--------------|-------------|------------|------------|------------|------------|-----|
|              | 151         |            | *          |            |            | 200 |
| p73RhoGAP    | KYICREFLDEV | QSYSGVVKMS | VQNLATVFGF | NILRP...K  | VEDPLTIMEG |     |
| Bcr          | LFLLDHLKRV  | AEKEAVNKMS | LHNLATVFGF | TLLRPSEKES | KLPANPSQPI |     |
| n-Chimerin   | RYLMAHLKRV  | TLHEKENILN | AENLGIVFGF | TLMRS...P  | ELDAMAALND |     |
| p50RhoGAP    | RFLTAFLVQI  | SAHSDQNKMT | NINLAVVFGF | NLLWA....  | .KDAAITLKA |     |
| p85 $\alpha$ | QYLLKHFFKL  | QTSKKNLLN  | ARVLSEIFSF | MLFRFS...S | AASSDNTENL |     |
| p190RhoGAP   | KYVISHLNKV  | SHNKNVNLMT | SENLSICFWF | TLMRP....  | DFSTMDALTA |     |
