# Supplementary material
Source: PubMed Central journal article supplement (PMC514459)

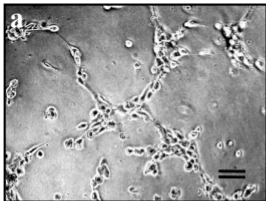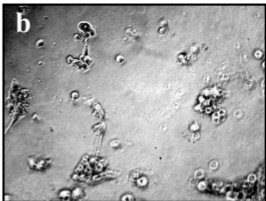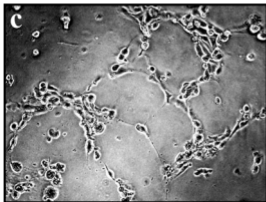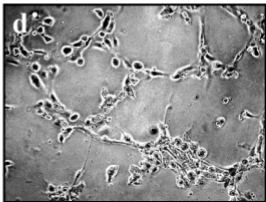

Supplement: pnas_101_33_12212__3.pdf [file pnas_101_33_12212__3.pdf]
